# Supplementary material for: Essential role of endothelial nitric oxide synthase for mobilization of stem and progenitor cells
Source: Springer Nature journal article supplement (doi:10.1038/nm948), 2003-10-12
Supplement: nm948-S7.pdf [file nm948-S7.pdf]

## Supplementary Fig. 7

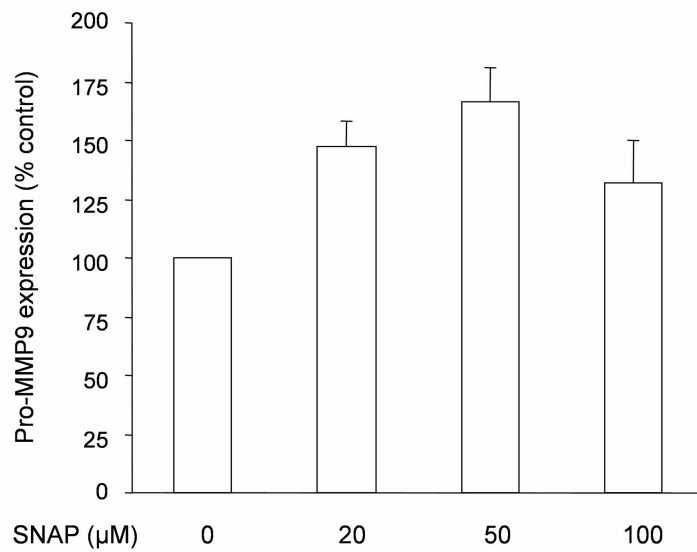

### **NO synthase activity in bone marrow stromal cells**

The NO donor S-nitrosopenicillamine (SNAP; Alexis) was incubated for 12 hours with cultivated stromal cells. Pro-MMP-9 was determined by ELISA in the cell culture supernatants (10-fold concentrates).
